# Supplementary material for: The role of aromatic side chains on the supramolecular hydrogelation of naphthalimide/dipeptide conjugates
Source: Royal Society of Chemistry journal article supplement (doi:10.1039/c7nj03565a), 2018-01-01
Supplement: c7nj03565a1.pdf [file c7nj03565a1.pdf]

# The Role of Aromatic Side Chains on the Supramolecular Hydrogelation of Naphthaleneimide/Dipeptide Conjugates

Shu-Min Hsu, Rajan Deepan Chakravarthy, Hsun Cheng, Fang-Yi Wu, Tsung-Sheng Lai, and Hsin-Chieh Lin\*

Department of Materials Science and Engineering, National Chiao Tung University, Hsinchu, 300, Taiwan, Republic of China

E-mail: hclin45@nctu.edu.tw

## Supporting Information

|     | Contents                                                                                                                   | Page Number |
|-----|----------------------------------------------------------------------------------------------------------------------------|-------------|
| 1.  | Syntheses of <b>1-4</b>                                                                                                    | <b>S2</b>   |
| 2.  | Partial <sup>1</sup> H NMR spectra of the hydrogelators <b>1-4</b>                                                         | <b>S8</b>   |
| 3.  | Frequency sweep rheological data of hydrogelator <b>1</b> .                                                                | <b>S9</b>   |
| 4.  | Strain sweep rheological data of hydrogelators <b>2-4</b> .                                                                | <b>S9</b>   |
| 5.  | Emission spectra of hydrogelators <b>1- 4</b> .                                                                            | <b>S10</b>  |
| 6.  | CD spectra of hydrogelators <b>1- 4</b> with HT signals.                                                                   | <b>S11</b>  |
| 7.  | Emission spectra of hydrogelators <b>1-4</b> at different concentrations with ThT (20 μM)                                  | <b>S12</b>  |
| 8.  | Emission spectra of hydrogelators <b>1-4</b> at different concentrations for measuring critical aggregation concentrations | <b>S13</b>  |
| 9.  | Fig. S8-S11: <sup>1</sup> H NMR spectra                                                                                    | <b>S14</b>  |
| 10. | Fig. S12-S15: <sup>13</sup> C NMR spectra                                                                                  | <b>S16</b>  |

**Synthesis of NI-Phe -Phe (NI-FF).** The peptide/dye conjugate derivative of **1** was prepared through SPPS using 2-chlorotrityl chloride resin, Fmoc-L-phenylalanine, Fmoc-L-phenylalanine and NI (Scheme 1). The resin (2.4 g) was swollen in anhydrous CH<sub>2</sub>Cl<sub>2</sub> for 30 min and then Fmoc-L-phenylalanine (1.16 g, 3.000 mmol) was loaded onto the resin in anhydrous *N,N*-dimethylformamide and *N,N*-diisopropylethylamine (DIEA; 1.24 mL, 7.500mmol) for 1 h. For deprotection of the Fmoc group, piperidine (20% in DMF) was added and the sample left for 20 min; this procedure was repeated twice (each time for 2 min). Fmoc-L-phenylalanine (1.55 g, 4.000 mmol) was coupled to the free amino group using *O*-(benzotriazol-1-yl)-*N,N,N',N'*-tetramethyluraniunhexafluorophosphate (HBTU) (1.52 g, 4.000 mmol) and *N,N*-diisopropylethylamine (DIEA) (1.65 mL, 10.000 mmol) as coupling agents for 30 min. Again, the sample was treated with piperidine (20% in DMF) for 20 min; this procedure was repeated twice (each time for 2 min). Finally, NI (1.53 g, 6.000 mmol) was coupled to the free amino group using HBTU (2.28 g, 6.000 mmol) and DIEA (2.48 mL, 15.000 mmol) as coupling agents. After the reaction mixture had been stirred overnight, the peptide derivative was cleaved through treatment with CF<sub>3</sub>CO<sub>2</sub>H (90% in DI water) for 3 h. The resulting solution was dried by air and then Et<sub>2</sub>O was added to precipitate the target product. The solid was dried under vacuum to remove residual solvent (White solid: 0.35 g).<sup>1</sup>H NMR (300 MHz, [D<sub>6</sub>]DMSO, 25°C): δ = 2.75-3.15 (m, 4H; CH<sub>2</sub>),

4.40-4.50 (m, 1H; CH), 4.55-4.65 (m, 1H; CH), 4.688 (s, 2H; CH<sub>2</sub>), 7.20-7.35 (m, 10H; CH), 7.90-8.00 (t,  $J = 7.8$  Hz, 2H; CH), 8.38 (d,  $J = 8.1$  Hz, 1H; NH), 8.48 (d,  $J = 8.4$  Hz, 1H; NH), 8.54 (d,  $J = 7.5$  Hz, 4H; CH); <sup>13</sup>C NMR (75 MHz, [D<sub>6</sub>]DMSO, 25°C):  $\delta = 37.7, 38.5, 43.1, 54.6, 122.8, 127.1, 127.4, 128.2, 128.4, 128.9, 129.1, 130.0, 130.2, 131.8, 132.3, 135.4, 138.3, 138.5, 164.1, 167.3, 171.8, 173.6$ ; MS [ESI<sup>-</sup>]: calcd.  $m/z$  549.19, obsvd. 548.1[M - H]<sup>-</sup>.

**Synthesis of NI-Tyr-Phe (NI-YF).** The peptide/dye conjugate derivative of **2** was prepared through SPPS using 2-chlorotrityl chloride resin, Fmoc-L-phenylalanine, Fmoc-L-tyrosine and NI (Scheme 1). The resin (2.4 g) was swollen in anhydrous CH<sub>2</sub>Cl<sub>2</sub> for 30 min and then Fmoc-L-phenylalanine (1.16 g, 3.000 mmol) was loaded onto the resin in anhydrous *N,N*-dimethylformamide and *N,N*-diisopropylethylamine (DIEA; 1.24 mL, 7.500mmol) for 1 h. For deprotection of the Fmoc group, piperidine (20% in DMF) was added and the sample left for 20 min; this procedure was repeated twice (each time for 2 min). Fmoc-L-tyrosine (1.84 g, 4.000 mmol) was coupled to the free amino group using *O*-(benzotriazol-1-yl)-*N,N,N',N'*- tetramethyluranium hexafluorophosphate (HBTU) (1.52 g, 4.000 mmol) and *N,N*-diisopropylethylamine (DIEA) (1.65 mL, 10.000 mmol) as coupling agents for 30 min. Again, the sample was treated with piperidine (20% in DMF) for 20 min; this procedure was repeated twice (each time for 2 min). Finally, NI (1.53 g, 6.000 mmol) was coupled to the free amino

group using HBTU (2.28 g, 6.000 mmol) and DIEA (2.48 mL, 15.000 mmol) as coupling agents. After the reaction mixture had been stirred overnight, the peptide derivative was cleaved through treatment with  $\text{CF}_3\text{CO}_2\text{H}$  (90% in DI water) for 3 h. The resulting solution was dried by air and then  $\text{Et}_2\text{O}$  was added to precipitate the target product. The solid was dried under vacuum to remove residual solvent (White solid: 1.06 g).  $^1\text{H}$  NMR (300 MHz,  $[\text{D}_6]\text{DMSO}$ ,  $25^\circ\text{C}$ ):  $\delta$  = 2.60-3.15 (m, 4H;  $\text{CH}_2$ ), 4.40-4.55 (m, 2H; CH), 4.693 (s, 2H;  $\text{CH}_2$ ), 6.68 (d,  $J$  = 8.1 Hz, 2H; CH), 7.06 (d,  $J$  = 8.4 Hz, 2H; CH), 7.15-7.40 (m, 5H; CH), 7.3 (t,  $J$  = 7.65 Hz, 2H; CH), 8.33 (d,  $J$  = 7.5 Hz, 1H; NH), 8.42 (d,  $J$  = 8.4 Hz, 1H; NH), 8.53 (d,  $J$  = 8.1 Hz, 4H; CH);  $^{13}\text{C}$  NMR (75 MHz,  $[\text{D}_6]\text{DMSO}$ ,  $25^\circ\text{C}$ ):  $\delta$  = 37.7, 43.1, 54.5, 55.0, 115.8, 122.9, 127.4, 128.2, 128.4, 128.6, 129.2, 130.1, 131.1, 131.8, 132.3, 135.5, 138.4, 156.7, 164.1, 167.3, 171.9, 173.6; MS  $[\text{ESI}^-]$ : calcd.  $m/z$  565.18, obsvd. 564.22 $[\text{M} - \text{H}]^-$ .

**Synthesis of NI-Phe-Tyr (NI-FY).** The peptide/dye conjugate derivative of **3** was prepared through SPPS using 2-chlorotrityl chloride resin, Fmoc-L-tyrosine, Fmoc-L-phenylalanine and NI (Scheme 1). The resin (2.4 g) was swollen in anhydrous  $\text{CH}_2\text{Cl}_2$  for 30 min and then Fmoc-L-tyrosine (1.38 g, 3.000 mmol) was loaded onto the resin in anhydrous  $N,N$ -dimethylformamide and  $N,N$ -diisopropylethylamine (DIEA; 1.24 mL, 7.500 mmol) for 1 h. For deprotection of the Fmoc group, piperidine (20% in DMF) was added and the sample left for 20 min; this procedure was repeated twice (each time

for 2 min). Fmoc-L-phenylalanine (1.55 g, 4.000 mmol) was coupled to the free amino group using *O*-(benzotriazol-1-yl)-*N,N,N',N'*-tetramethyluronium hexafluorophosphate (HBTU) (1.52 g, 4.000 mmol) and *N,N*-diisopropylethylamine (DIEA) (1.65 mL, 10.000 mmol) as coupling agents for 30 min. Again, the sample was treated with piperidine (20% in DMF) for 20 min; this procedure was repeated twice (each time for 2 min). Finally, NI (1.53 g, 6.000 mmol) was coupled to the free amino group using HBTU (2.28 g, 6.000 mmol) and DIEA (2.48 mL, 15.000 mmol) as coupling agents. After the reaction mixture had been stirred overnight, the peptide derivative was cleaved through treatment with CF<sub>3</sub>CO<sub>2</sub>H (90% in DI water) for 3 h. The resulting solution was dried by air and then Et<sub>2</sub>O was added to precipitate the target product. The solid was dried under vacuum to remove residual solvent (White solid: 1.15 g). <sup>1</sup>H NMR (300 MHz, [D<sub>6</sub>]DMSO, 25°C): δ = 2.75-3.10 (m, 4H; CH<sub>2</sub>), 4.35-4.45 (m, 1H; CH), 4.55-4.65 (m, 1H; CH), 4.694 (s, 2H; CH<sub>2</sub>), 6.70 (d, *J* = 8.4 Hz, 2H; CH), 7.06 (d, *J* = 8.4 Hz, 2H; CH), 7.20-7.35 (m, 5H; CH), 7.92 (t, *J* = 7.65 Hz, 2H; CH), 8.29 (d, *J* = 7.5 Hz, 1H; NH), 8.45-8.55 (m, 5H; CH, NH); <sup>13</sup>C NMR (75 MHz, [D<sub>6</sub>]DMSO, 25°C): δ = 40.0, 38.5, 43.1, 54.6, 54.9, 116.0, 122.8, 127.1, 128.2, 128.3, 128.4, 128.9, 130.2, 131.0, 131.8, 132.3, 135.5, 138.6, 156.9, 164.1, 167.4, 171.8, 173.7; MS [ESI<sup>-</sup>]: calcd. *m/z* 565.18, obsvd. 564.2[M - H]<sup>-</sup>.

**Synthesis of NI-Tyr-Tyr (NI-YY).** The peptide/dye conjugate derivative of **4** was prepared through SPPS using 2-chlorotrityl chloride resin, Fmoc-L-tyrosine, Fmoc-L-tyrosine and NI (Scheme 1). The resin (1.2 g) was swollen in anhydrous CH<sub>2</sub>Cl<sub>2</sub> for 30 min and then Fmoc-L-tyrosine (0.919 g, 2.000 mmol) was loaded onto the resin in anhydrous *N,N*-dimethylformamide and *N,N*-diisopropylethylamine (DIEA; 0.830 mL, 5.000mmol) for 1 h. For deprotection of the Fmoc group, piperidine (20% in DMF) was added and the sample left for 20 min; this procedure was repeated twice (each time for 2 min). Fmoc-L-tyrosine (0.919 g, 2.000 mmol) was coupled to the free amino group using *O*-(benzotriazol-1-yl)-*N,N,N',N'*-tetramethyluroniumhexafluorophosphate (HBTU) (0.758 g, 2.000 mmol) and *N,N*-diisopropylethylamine (DIEA) (0.83 mL, 5.000 mmol) as coupling agents for 30 min. Again, the sample was treated with piperidine (20% in DMF) for 20 min; this procedure was repeated twice (each time for 2 min). Finally, NI (0.510 g, 2.000 mmol) was coupled to the free amino group using HBTU (0.758 g, 2.000 mmol) and DIEA (0.830 mL, 5.000 mmol) as coupling agents. After the reaction mixture had been stirred overnight, the peptide derivative was cleaved through treatment with CF<sub>3</sub>CO<sub>2</sub>H (90% in DI water) for 3 h. The resulting solution was dried by air and then Et<sub>2</sub>O was added to precipitate the target product. The solid was dried under vacuum to remove residual solvent (light-yellow solid: 0.32 g). <sup>1</sup>H NMR (300 MHz, [D<sub>6</sub>]DMSO, 25°C): δ=2.60-3.15 (m, 4H; CH<sub>2</sub>), 4.30-4.40 (m, 1H;

CH), 4.40-4.55 (m, 1H; CH), 2.70-2.90 (m, 1H; CH<sub>2</sub>), 4.697 (s, 2H; CH<sub>2</sub>), 6.60-6.75 (m, 4H; CH), 7.00-7.15(m, 4H; CH), 7.94 (t,  $J=7.8$  Hz, 2H; CH), 8.21 (d,  $J=6.9$  Hz, 1H; NH), 8.43 (d,  $J=8.4$  Hz, 1H; NH), 8.54 (d,  $J=7.8$  Hz, 4H; CH); <sup>13</sup>C NMR (75 MHz, [D<sub>6</sub>]DMSO, 25°C):  $\delta=^{13}\text{C}$  NMR (300 MHz, DMSO-d<sub>6</sub>):  $\delta = 37.0, 37.7, 43.2, 55.0, 115.8, 116.0, 122.9, 128.2, 128.4, 128.7, 131.0, 131.2, 131.8, 132.3, 135.5, 156.7, 156.9, 164.2, 167.3, 171.9, 173.8$ ; MS [ESI<sup>-</sup>]: calcd. m/z 581.1, obsvd. 580.5[M - H]<sup>-</sup>.

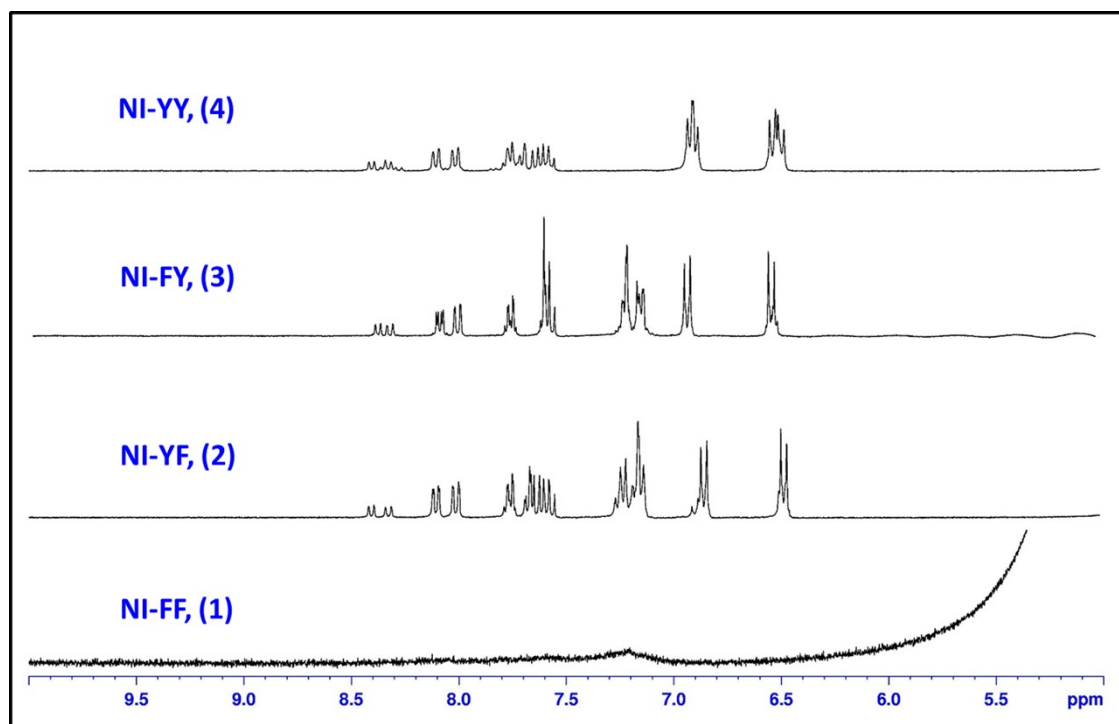

Fig. S1. Partial <sup>1</sup>H NMR spectra (300 MHz, D<sub>2</sub>O + NaOD, pD = 11) of the hydrogelators **1-4**.



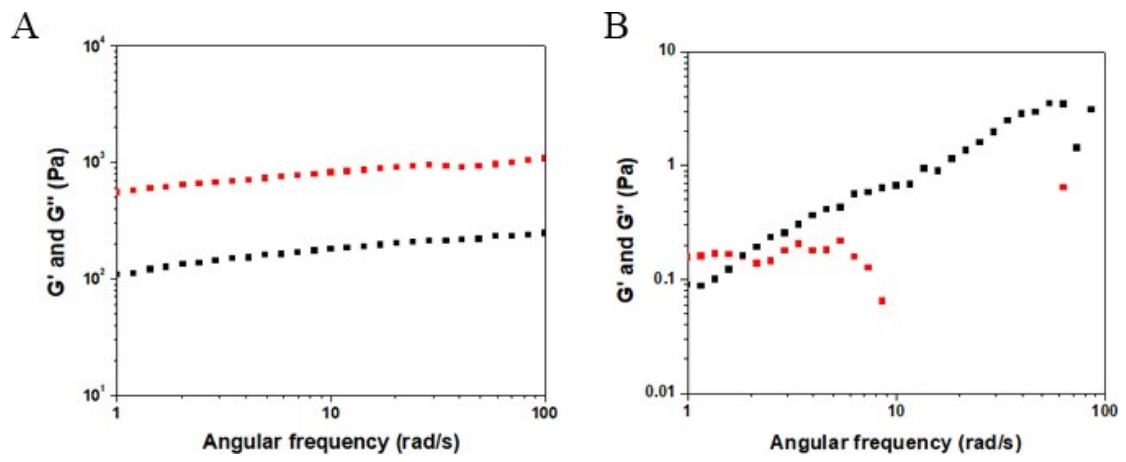

Fig. S2. Frequency sweep rheological data of hydrogelator 1 measured twice.

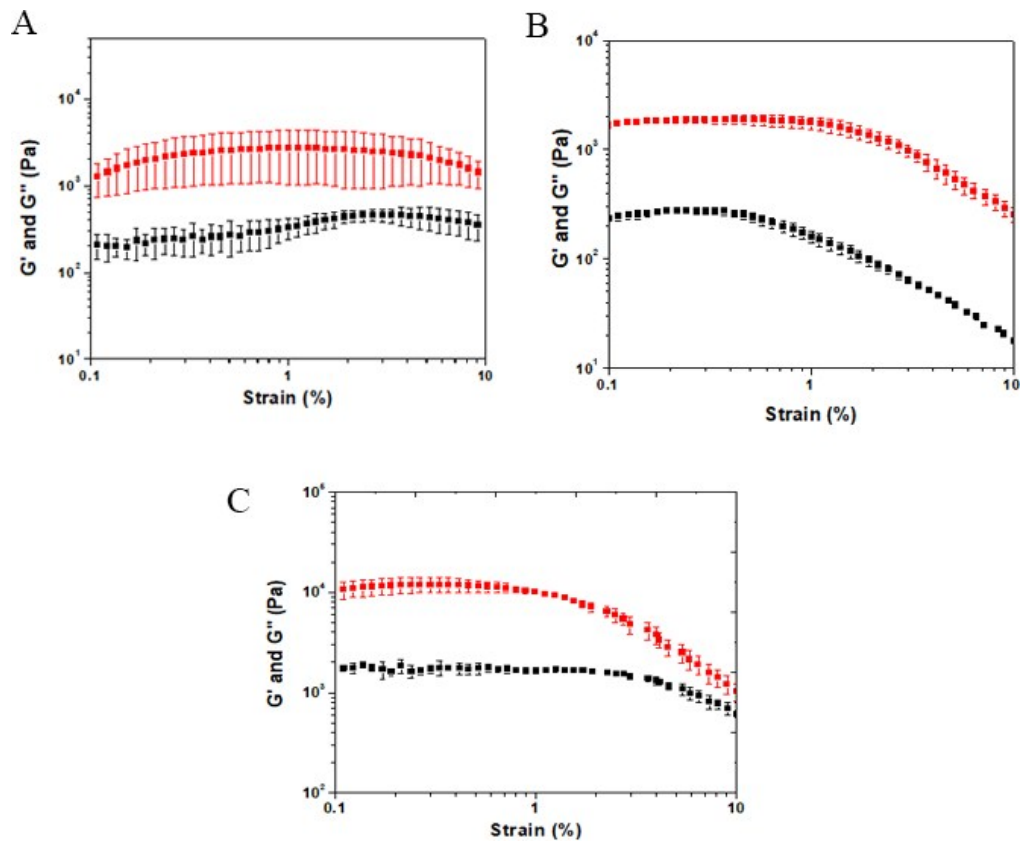

Fig. S3. Strain sweep rheological data of hydrogelators 2-4.

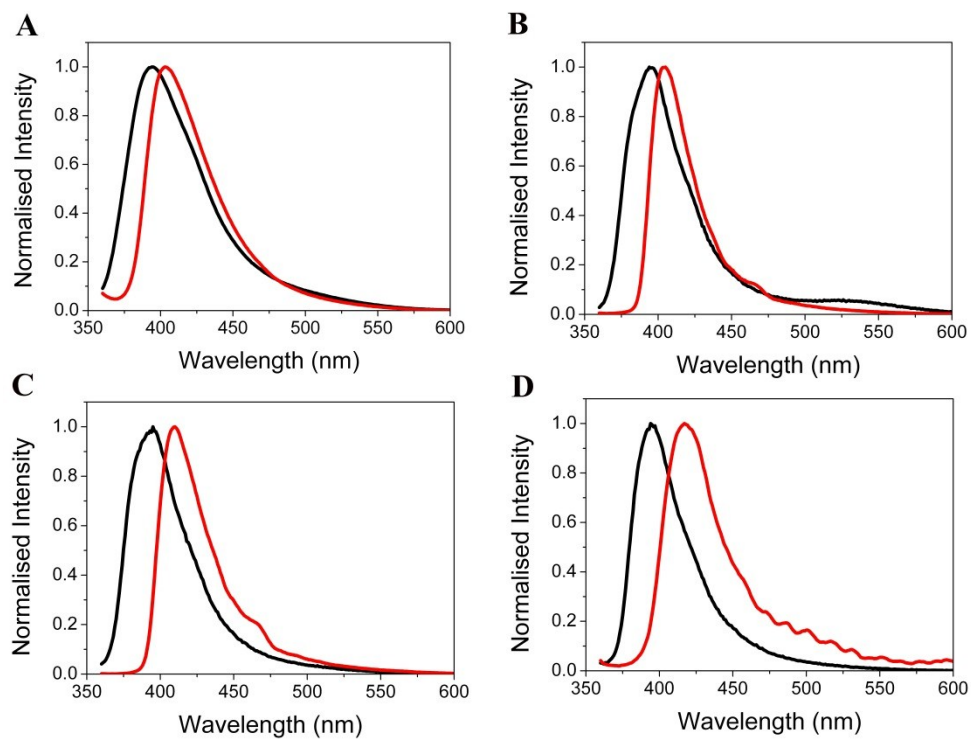

Fig. S4. Emission spectra of hydrogelators (A) **1**, (B) **2**, (C) **3** and (D) **4** at 0.05wt% (solution, black line) and 1wt% (gel, red line).

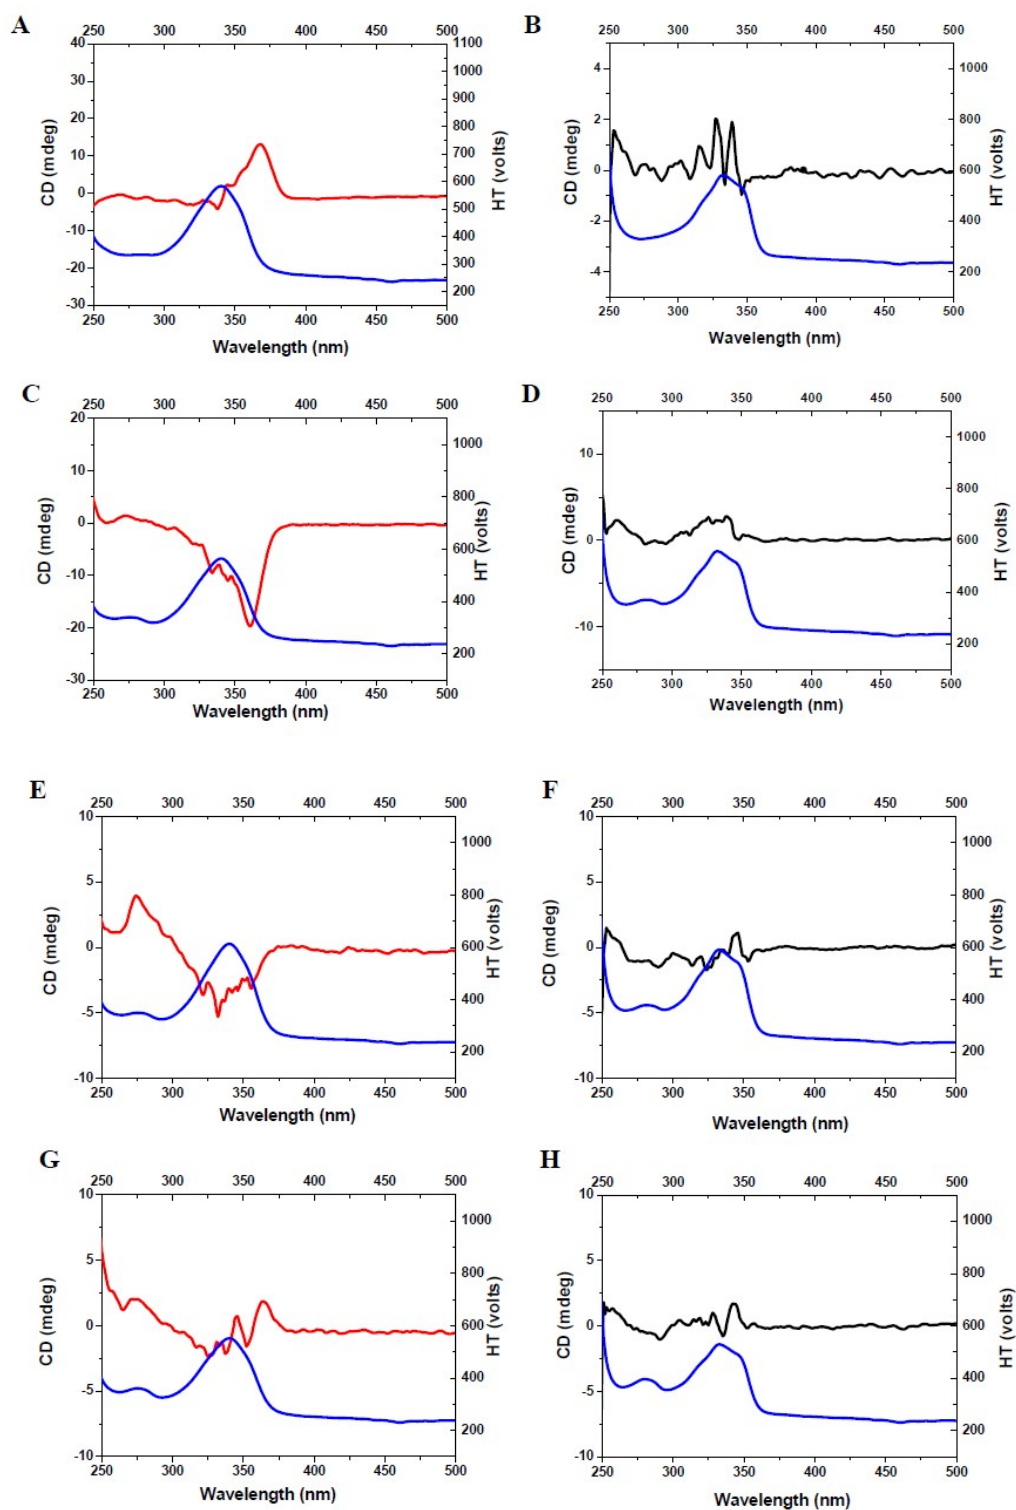

Fig. S5. CD spectra of hydrogelators **1** (A, B), **2** (C, D), **3** (E, F) and **4** (G, H) with HT signals (blue line) at 1600  $\mu$ M in water (red line) and DMSO (black line)

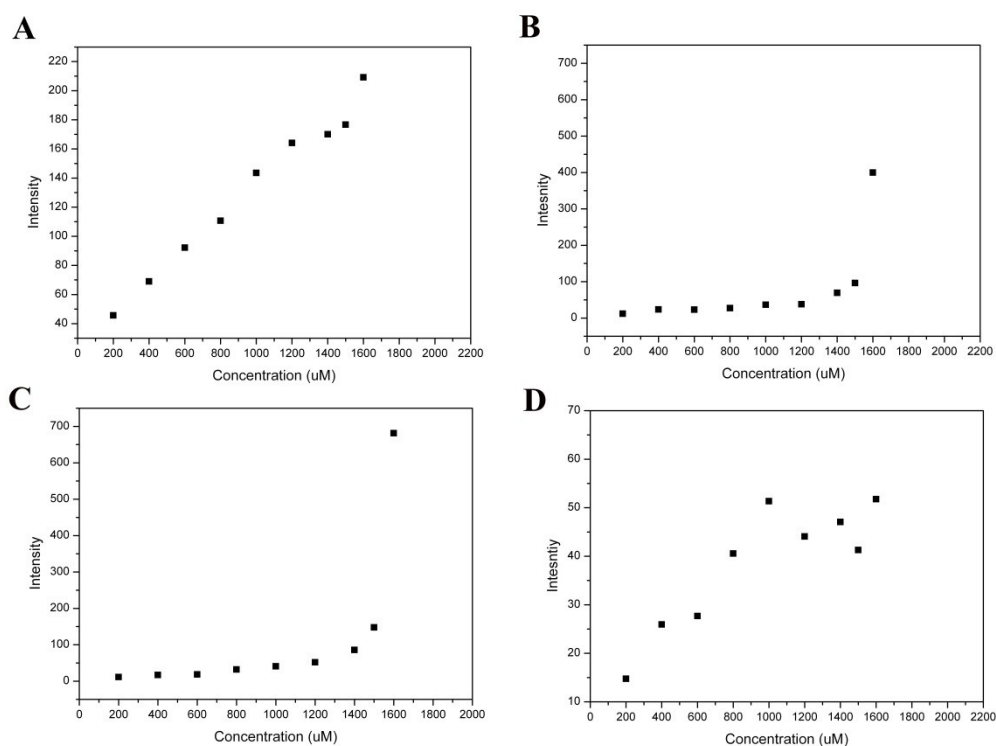

Fig. S6. Emission spectra of hydrogelators (A) **1**, (B) **2**, (C) **3** and (D) **4** at different concentrations with ThT (20  $\mu$ M); excitation at 440 nm and emission maximum at 480 nm.

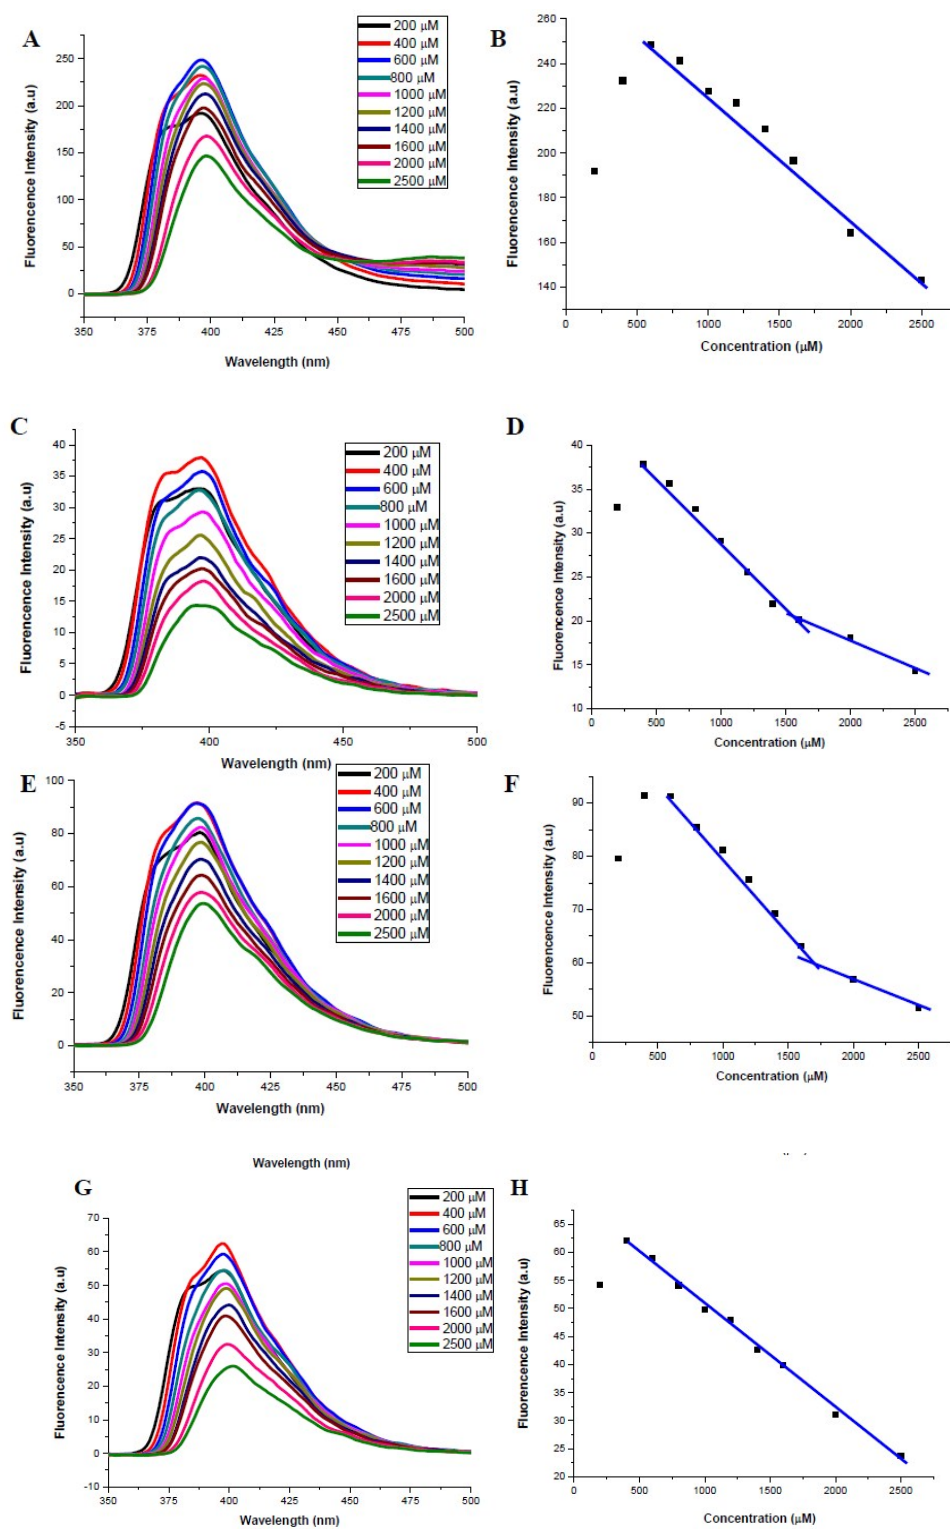

Fig. S7. Emission spectra of hydrogelators **1** (A, B), **2** (C, D), **3** (E, F) and **4** (G, H) at different concentrations; Figures B, D, F and H are the plot of fluorescence emission intensity (at 396 nm) versus the concentration of the **1-4**.

NI-FF

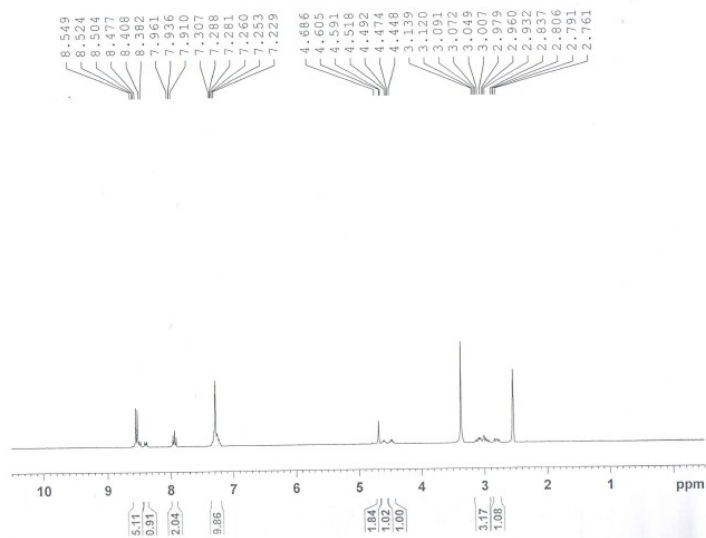

Fig. S8.  $^1\text{H}$  NMR spectrum of **1** in  $[\text{D}_6]\text{DMSO}$ .

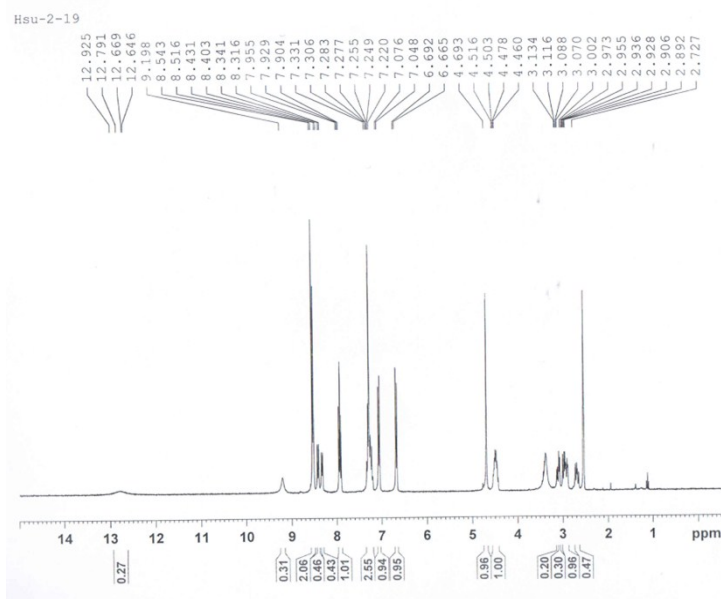

Fig. S9.  $^1\text{H}$  NMR spectrum of **2** in  $[\text{D}_6]\text{DMSO}$ .

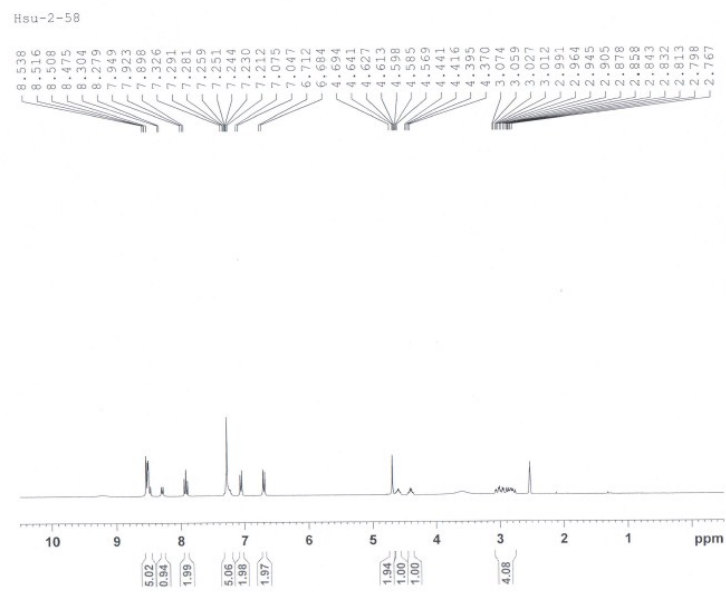

Fig. S10.  $^1\text{H}$  NMR spectrum of **3** in  $[\text{D}_6]\text{DMSO}$ .

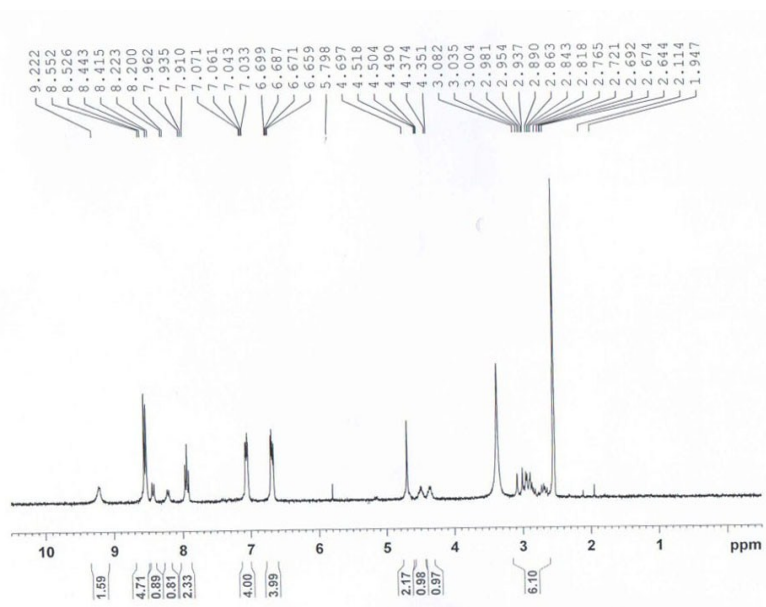

Fig. S11.  $^1\text{H}$  NMR spectrum of **4** in  $[\text{D}_6]\text{DMSO}$ .

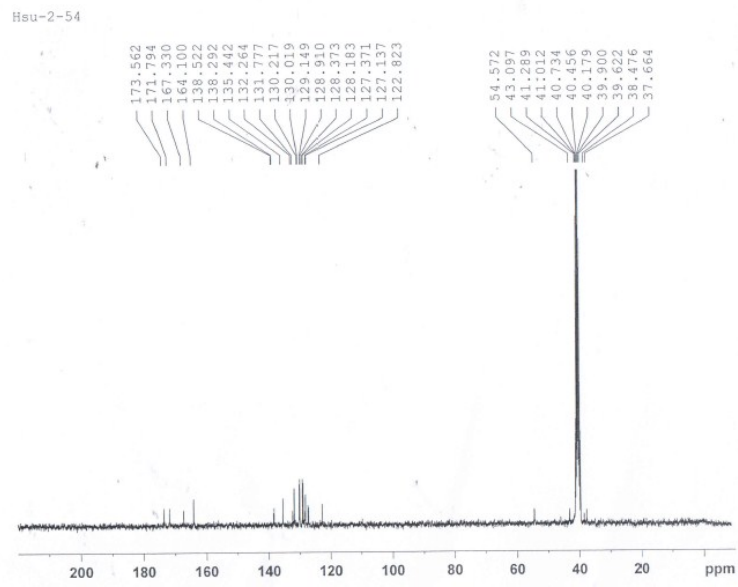

Fig. S12.  $^{13}\text{C}$  NMR spectrum of **1** in  $[\text{D}_6]\text{DMSO}$ .

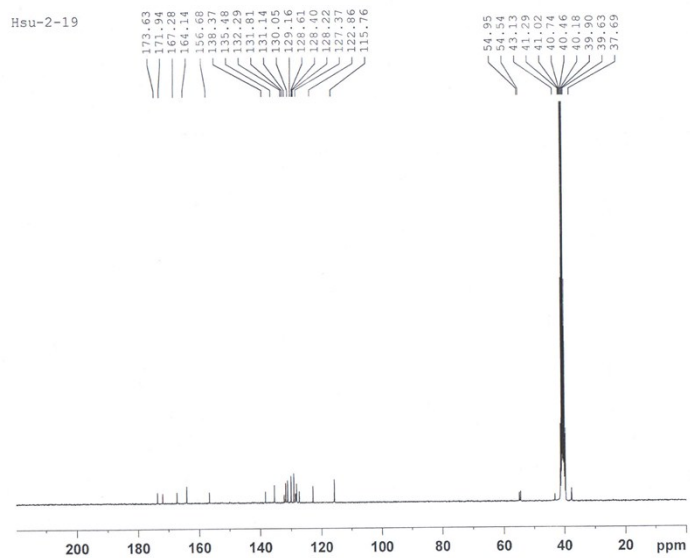

Fig. S13.  $^{13}\text{C}$  NMR spectrum of **2** in  $[\text{D}_6]\text{DMSO}$ .



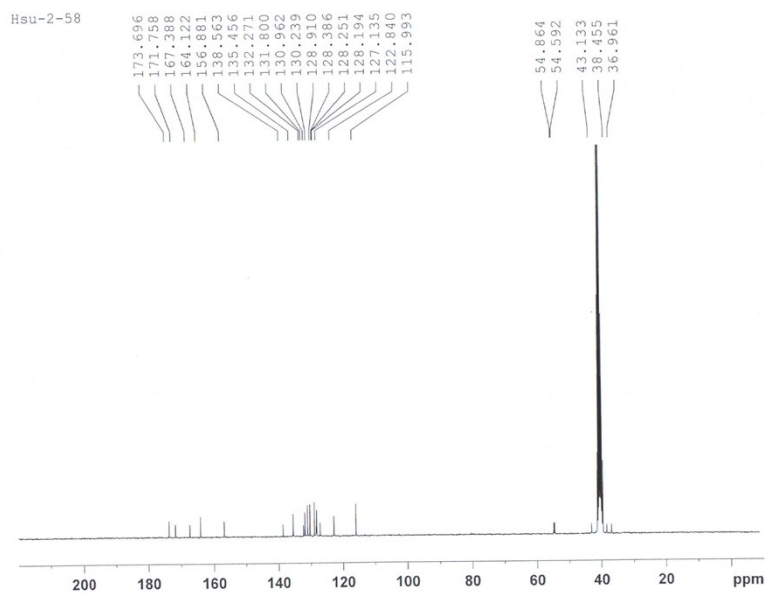

Fig. S14.  $^{13}\text{C}$  NMR spectrum of **3** in  $[\text{D}_6]\text{DMSO}$ .

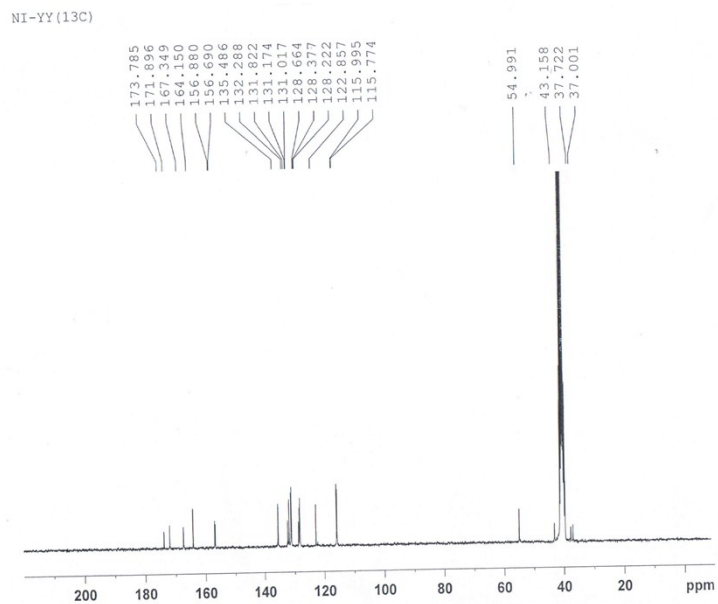

Fig. S15.  $^{13}\text{C}$  NMR spectrum of **4** in  $[\text{D}_6]\text{DMSO}$ .
